# Supplementary material for: Metabarcoding Analysis of Ichthyoplankton in the East/Japan Sea Using the Novel Fish-Specific Universal Primer Set
Source: Frontiers journal article supplement (doi:10.3389/fmars.2021.614394), 2021-03-17
Supplement: Table_1.xlsx [file Table_1.xlsx]

## Sheet: Sheet1
Supplementary data 1. A list of species and GenBank accession number of 1,808 reference sequences in this study
GenBank accession number	Species
NC_011943.1	Abalistes stellaris
NC_026900.1	Abbottina obtusirostris
NC_023781.1	Abbottina rivularis
NC_011180.1	Ablennes hians
NC_020356.1	Abramis brama
NC_009064.1	Abudefduf vaigiensis
NC_011947.1	Acanthaluteres brownii
NC_006131.1	Acanthogobius hasta
NC_010977.1	Acanthopagrus latus
NC_018553.1	Acanthopagrus schlegelii
NC_023101.1	Acanthorhodeus chankaensis
NC_009830.1	Acanthurus leucosternon
NC_010108.1	Acanthurus lineatus
NC_008669.1	Acantopsis choirorhynchos
NC_020346.1	Acentrogobius chlorostigmatoides
NC_018064.1	Acentrogobius pflaumii
NC_015755.1	Acestrorhynchus sp.
NC_026872.1	Acheilognathus barbatus
NC_026720.1	Acheilognathus imberbis
NC_013705.1	Acheilognathus intermedia
NC_013704.1	Tanakia koreensis
NC_013711.1	Acheilognathus macropterus
NC_013702.1	Acheilognathus signifer
NC_014882.1	Acheilognathus somjinensis
NC_008668.1	Acheilognathus typus
NC_013712.1	Acheilognathus yamatsutae
NC_023768.1	Achirus lineatus
NC_017603.1	Acipenser baerii
NC_005451.1	Acipenser dabryanus
NC_012576.1	Acipenser gueldenstaedtii
NC_022453.1	Acipenser ruthenus
NC_021757.1	Acipenser schrenckii
NC_012646.1	Acipenser sinensis
NC_005795.1	Acipenser stellatus
NC_027417.1	Acipenser sturio
NC_004743.1	Acipenser transmontanus
NC_011950.1	Acreichthys tomentosus
NC_022184.1	Acrossocheilus barbodon
NC_023378.1	Acrossocheilus fasciatus
NC_022183.1	Acrossocheilus hemispinus
NC_024844.1	Acrossocheilus kreyenbergii
NC_022145.1	Acrossocheilus monticola
NC_026973.1	Acrossocheilus parallens
NC_024934.1	Acrossocheilus stenotaeniatus
NC_020145.1	Acrossocheilus wenchowensis
NC_010270.1	Aeoliscus strigatus
NC_021969.1	Aesopia cornuta
NC_022141.1	Aethaloperca rogaa
NC_022837.1	Aetobatus flagellum
NC_026717.1	Ageneiosus pardalis
NC_017876.1	Agonostomus monticola
NC_005800.1	Albula glossodonta
NC_008659.1	Alburnus alburnus
NC_019574.1	Alburnus istanbulensis
NC_019575.1	Alburnus tarichi
NC_017879.1	Aldrichetta forsteri
NC_005801.1	Aldrovandia affinis
NC_025566.1	Alectis ciliaris
NC_023524.1	Alepes kleinii
NC_013564.1	Alepocephalus agassizii
NC_013566.1	Alepocephalus australis
NC_013567.1	Alepocephalus bairdii
NC_011012.1	Alepocephalus bicolor
NC_013570.1	Alepocephalus productus
NC_004590.1	Alepocephalus tenebrosus
NC_013572.1	Alepocephalus umbriceps
NC_004398.1	Allocyttus niger
NC_022822.1	Alopias pelagicus
NC_009575.1	Alosa alosa
NC_009576.1	Alosa pseudoharengus
NC_014690.1	Alosa sapidissima
NC_027268.1	Aluterus monoceros
NC_011323.1	Aluterus scriptus
NC_011952.1	Amanses scopas
NC_014265.1	Amazonsprattus scintilla
NC_027175.1	Ambastaia sidthimunki
NC_015745.1	Amblydoras gonzalezi
NC_000893.1	Amblyraja radiata
NC_004742.1	Amia calva
NC_020461.1	Ammodytes hexapterus
NC_021374.1	Ammodytes personatus
NC_020347.1	Amoya chusanensis
NC_015746.1	Amphilius sp.
NC_023827.1	Amphilophus citrinellus
NC_016701.1	Amphiprion bicinctus
NC_023967.1	Amphiprion clarkii
NC_024840.1	Amphiprion frenatus
NC_009065.1	Amphiprion ocellaris
NC_023966.1	Amphiprion percula
NC_024841.1	Amphiprion perideraion
NC_023826.1	Amphiprion polymnus
NC_024752.1	Anabas testudineus
NC_013613.1	Anarchias sp.
NC_009773.1	Anarhichas lupus
NC_027741.1	Ancherythroculter lini
NC_021414.1	Ancherythroculter nigrocauda
NC_014269.1	Anchoviella sp.
NC_025671.1	Andinoacara rivulatus
NC_006531.1	Anguilla anguilla
NC_006532.1	Anguilla australis australis
NC_006533.1	Anguilla australis schmidti
NC_006543.1	Anguilla bengalensis labiata
NC_006534.1	Anguilla bicolor bicolor
NC_006535.3	Anguilla bicolor pacifica
NC_006537.1	Anguilla celebesensis
NC_006538.1	Anguilla dieffenbachii
NC_006539.1	Anguilla interioris
NC_002707.2	Anguilla japonica
NC_011575.1	Anguilla luzonensis
NC_006536.1	Anguilla malgumora
NC_006540.1	Anguilla marmorata
NC_006541.1	Anguilla megastoma
NC_006542.1	Anguilla mossambica
NC_006544.1	Anguilla nebulosa nebulosa
NC_006545.1	Anguilla obscura
NC_006546.1	Anguilla reinhardtii
NC_006547.2	Anguilla rostrata
NC_021446.1	Anodontostoma chacunda
NC_008128.1	Anomalops katoptron
NC_011319.1	Anoplocapros lenticularis
NC_004391.1	Anoplogaster cornuta
NC_018119.1	Anoplopoma fimbria
NC_026307.1	Anoxypristis cuspidata
NC_003191.1	Antigonia capros
NC_012709.1	Anyperodon leucogrammicus
NC_015834.1	Apareiodon affinis
NC_011580.1	Apeltes quadracus
NC_022506.1	Aphanopus carbo
NC_004372.1	Aphredoderus sayanus
NC_008650.1	Aphyocypris chinensis
NC_019620.1	Aphyocypris kikuchii
NC_011176.1	Aplocheilus panchax
NC_022510.1	Apogon semilineatus
NC_027592.1	Apolemichthys griffisi
NC_026520.1	Apolemichthys kingi
NC_004692.1	Apteronotus albifrons
NC_008129.1	Aptocyclus ventricosus
NC_010570.1	Arapaima gigas
NC_004413.1	Arcos sp.
NC_010122.1	Arctogadus glacialis
NC_002812.1	Arctoscopus japonicus
NC_025937.1	Argyrosomus amoyensis
NC_017610.1	Argyrosomus japonicus
NC_022498.1	Ariomma indicum
NC_022497.1	Ariomma lurida
NC_013632.1	Ariosoma shiroanago
NC_024946.1	Arnoglossus polyspilus
NC_010975.1	Arothron firmamentum
NC_015336.1	Arothron hispidus
NC_015371.1	Arothron manilensis
NC_015787.1	Arripis trutta
NC_024285.1	Aseraggodes kobensis
NC_008130.1	Aspasma minima
NC_015536.1	Cabdio morar
NC_022855.1	Aspiorhynchus laticeps
NC_022494.1	Assurger anzac
NC_018560.1	Astatotilapia calliptera
NC_009058.1	Astronotus ocellatus
NC_012045.1	Ataxolepis apus
NC_003178.1	Ateleopus japonicus
NC_025942.1	Atlantoraja castelnaui
NC_008131.1	Atractosteus spatula
NC_024178.1	Atractosteus tropicus
NC_026222.1	Atule mate
NC_015809.1	Auchenoglanis occidentalis
NC_011569.1	Aulichthys japonicus
NC_002674.1	Hime japonica
NC_010268.1	Aulorhynchus flavidus
NC_010269.1	Aulostomus chinensis
NC_015348.1	Auriglobus modestus
NC_005313.1	Auxis rochei
NC_005318.1	Auxis thazard
NC_013624.2	Avocettina infans
NC_021606.1	Bagarius yarrelli
NC_018347.1	Bahaba taipingensis
NC_013577.1	Bajacalifornia megalops
NC_011946.1	Balistapus undulatus
NC_011948.1	Balistes vetula
NC_011934.1	Balistoides conspicillum
NC_026221.1	Bangana decora
NC_027069.1	Bangana tungting
NC_027192.1	Barbatula barbatula
NC_022858.1	Barbatula nuda
NC_008670.1	Barbatula toni
NC_008655.1	Barbonymus gonionotus
NC_024274.1	Barbonymus schwanenfeldii
NC_012046.1	Barbourisia rufa
NC_008654.1	Barbus barbus
NC_008666.1	Barbus trimaculatus
NC_015533.1	Barilius bendelisis
NC_004374.1	Bassozetus zenkevitchi
NC_008222.1	Bathygadus antrodes
NC_011015.1	Bathyprion danae
NC_013574.1	Bathytroctes breviceps
NC_013575.1	Bathytroctes macrolepis
NC_013579.1	Bathytroctes michaelsarsi
NC_011017.1	Bathytroctes microlepis
NC_027291.1	Beaufortia szechuanensis
NC_023975.1	Belligobio nummifer
NC_022504.1	Benthodesmus tenuis
NC_004393.1	Beryx decadactylus
NC_013845.1	Beryx mollis
NC_003188.1	Beryx splendens
NC_026581.1	Betta splendens
NC_024854.1	Bidyanus bidyanus
NC_022188.1	Biwia springeri
NC_008324.1	Biwia zezera
NC_020355.1	Blicca bjoerkna
NC_023468.1	Boleophthalmus boddarti
NC_016195.1	Boleophthalmus pectinirostris
NC_010121.1	Boreogadus saida
NC_024847.1	Bostockia porosa
NC_017880.1	Bostrychus sinensis
NC_024947.1	Bothus pantherinus
NC_027495.1	Botia lohachata
NC_011940.1	Brachaluteres ulvarum
NC_026078.1	Brachirus orientalis
NC_015078.1	Brachyhypopomus occidentalis
NC_018341.1	Brachymystax lenok
NC_018342.1	Brachymystax lenok tsinlingensis
NC_024674.1	Brachymystax tumensis
NC_012905.1	Branchiostegus albus
NC_012907.1	Branchiostegus argentatus
NC_012904.1	Branchiostegus japonicus
NC_008124.1	Bregmaceros nectabanus
NC_014266.1	Brevoortia tyrannus
NC_012705.1	Brienomyrus niger
NC_026873.1	Brycon henni
NC_024938.1	Brycon orbignyanus
NC_013869.1	Bufoceratias thele
NC_015811.1	Bunocephalus coracoideus
NC_024194.1	Callionymus enneactis
NC_014281.1	Callorhinchus callorynchus
NC_014284.1	Callorhinchus capensis
NC_014285.1	Callorhinchus milii
NC_008102.1	Campostoma anomalum
NC_022960.1	Campylomormyrus compressirostris
NC_011325.1	Cantherhines pardalis
NC_011935.1	Canthidermis maculata
NC_010978.1	Canthigaster coronata
NC_015372.1	Canthigaster jactator
NC_010979.1	Canthigaster rivulata
NC_015337.1	Canthigaster valentini
NC_010958.1	Capros aper
NC_004405.1	Carangoides armatus
NC_025644.1	Carangoides equula
NC_023968.1	Carangoides malabaricus
NC_022932.1	Caranx ignobilis
NC_004406.1	Caranx melampygus
NC_004373.1	Carapus bermudensis
NC_002079.1	Carassius auratus
NC_012980.1	Carassius auratus
NC_015142.1	Carassius auratus ssp. 'Pingxiang'
NC_006580.1	Carassius auratus auratus
NC_006291.1	Carassius carassius
NC_010768.1	Carassius cuvieri
NC_014177.1	Carassius gibelio
NC_024055.1	Carcharhinus acronotus
NC_023948.1	Carcharhinus amblyrhynchoides
NC_026696.1	Carcharhinus amboinensis
NC_027081.1	Carcharhinus brevipinna
NC_023522.1	Carcharhinus leucas
NC_025520.1	Carcharhinus longimanus
NC_024862.1	Carcharhinus macloti
NC_024284.1	Carcharhinus melanopterus
NC_020611.1	Carcharhinus obscurus
NC_024596.1	Carcharhinus plumbeus
NC_023521.1	Carcharhinus sorrah
NC_026871.1	Carcharhinus tjutjot
NC_023520.1	Carcharias taurus
NC_022415.1	Carcharodon carcharias
NC_015350.1	Carinotetraodon lorteti
NC_015352.1	Carinotetraodon salivator
NC_005257.1	Carpiodes carpio
NC_004375.1	Cataetyx rubrirostris
NC_016892.1	Catla catla
NC_008647.1	Catostomus commersonii
NC_016020.1	Caulophryne pelagica
NC_015748.1	Centromochlus perugiae
NC_026451.1	Centropyge interrupta
NC_027652.1	Centropyge joculator
NC_009872.1	Centropyge loricula
NC_027651.1	Centropyge multicolor
NC_027598.1	Centropyge venusta
NC_022142.1	Cephalopholis argus
NC_021134.1	Cephalopholis boenak
NC_024100.1	Cephalopholis sexmaculata
NC_022143.1	Cephalopholis sonnerati
NC_013882.1	Ceratias uranoscopus
NC_012048.1	Cetomimus sp.
NC_027436.1	Cetonurus globiceps
NC_023266.1	Cetorhinus maximus
NC_004389.1	Cetostoma regani
NC_015654.1	Chaenocephalus aceratus
NC_027193.1	Chaenogobius gulosus
NC_017881.1	Chaenomugil proboscideus
NC_011951.1	Chaetodermis penicilligerus
NC_009870.1	Chaetodon auripes
NC_026883.1	Chaetodontoplus conspicillatus
NC_026521.1	Chaetodontoplus mesoleucus
NC_009873.1	Chaetodontoplus septentrionalis
NC_020786.1	Chaeturichthys stigmatias
NC_004700.1	Chalceus macrolepidotus
NC_018340.1	Champsocephalus gunnari
NC_022483.1	Champsodon cf. snyderi
NC_015191.1	Channa argus
NC_025225.1	Channa asiatica
NC_020011.1	Channa maculata
NC_022713.1	Channa marulius
NC_021418.1	Chanodichthys dabryi
NC_008683.1	Chanodichthys mongolicus
NC_004693.1	Chanos chanos
NC_003159.1	Chauliodus sloani
NC_004381.1	Chaunax abei
NC_013883.1	Chaunax pictus
NC_004382.1	Chaunax tosaensis
NC_013842.1	Cheilinus undulatus
NC_020672.1	Cheilochromis euchilus
NC_026899.1	Cheilodactylus variegatus
NC_024858.1	Cheilodactylus zonatus
NC_025953.1	Chelmon rostratus
NC_017883.1	Chelon labrosus
NC_011623.1	Chelonodon patoca
NC_015369.1	Chelonodon pleurospilus
NC_015801.1	Chilodus punctatus
NC_011331.1	Chilomycterus reticulatus
NC_017882.1	Chiloscyllium griseum
NC_012570.1	Chiloscyllium plagiosum
NC_016686.1	Chiloscyllium punctatum
NC_014288.1	Chimaera fulva
NC_003136.1	Chimaera monstrosa
NC_010689.1	Chionodraco myersi
NC_006913.1	Chirocentrus dorab
NC_024883.1	Chirostoma humboldtianum
NC_012710.1	Chitala blanci
NC_012711.1	Chitala lopis
NC_012712.1	Chitala ornata
NC_022729.1	Chlamydoselachus anguineus
NC_003160.1	Chlorophthalmus agassizi
NC_027654.1	Chlorophthalmus nigromarginatus
NC_006355.1	Chlorurus sordidus
NC_025771.1	Choerodon schoenleinii
NC_008108.1	Iberochondrostoma lemmingii
NC_008671.1	Chromobotia macracanthus
NC_016987.1	Chrysochir aureus
NC_024059.2	Cirrhigaleus australis
NC_022182.1	Cirrhinus molitorella
NC_017611.1	Cirrhinus mrigala
NC_024857.1	Cirrhitichthys aprinus
NC_015805.1	Citharinus congicus
NC_024948.1	Citharoides macrolepidotus
NC_023923.1	Clarias batrachus
NC_023941.1	Clarias fuscus
NC_027661.1	Clarias gariepinus
NC_015749.1	Clarias sp.
NC_013828.1	Clinocottus analis
NC_018600.1	Clupanodon thrissa
NC_009577.1	Clupea harengus
NC_009578.1	Clupea pallasii
NC_016702.1	Clupeichthys aesarnensis
NC_016721.1	Clupeichthys goniognathus
NC_016705.1	Clupeichthys perakensis
NC_016709.1	Clupeoides borneensis
NC_016714.1	Clupeoides sp.
NC_015109.1	Clupeonella cultriventris
NC_027663.1	Cobitis biwae
NC_010649.2	Cobitis choii
NC_023947.1	Cobitis elongatoides
NC_023473.1	Cobitis melanoleuca granoei
NC_022717.1	Cobitis lutheri
NC_007229.1	Cobitis sinensis
NC_004695.1	Cobitis striata
NC_015306.1	Cobitis takatsuensis
NC_013886.1	Coelophrys brevicaudata
NC_003169.1	Coelorinchus kishinouyei
NC_026912.1	Coilia brachygnathus
NC_019625.1	Coilia ectenes
NC_023538.1	Coilia grayii
NC_014271.1	Coilia lindmani
NC_019644.1	Coilia mystus
NC_009579.1	Coilia nasus
NC_014276.1	Coilia reynaldi
NC_026794.1	Colisa fasciata
NC_022479.1	Colisa lalia
NC_023447.1	Colistium nudipinnis
NC_014350.1	Collichthys lucidus
NC_014263.1	Collichthys niveatus
NC_013606.1	Coloconger cadenati
NC_003183.1	Cololabis saira
NC_015368.1	Colomesus asellus
NC_015370.1	Colomesus psittacus
NC_026469.1	Colossoma macropomum
NC_027186.1	Conger japonicus
NC_002761.2	Conger myriaster
NC_013581.1	Conocara macropterum
NC_013583.1	Conocara murrayi
NC_026110.1	Coptodon zillii
NC_027277.1	Coregonus autumnalis
NC_020762.1	Coregonus clupeaformis
NC_002646.1	Coregonus lavaretus
NC_020760.1	Coregonus nasus
NC_020765.1	Coregonus oxyrinchus
NC_025576.1	Coregonus peled
NC_025648.1	Coregonus ussuriensis
NC_020041.1	Coreius guichenoti
NC_020042.1	Coreius heterodon
NC_007783.2	Coreoleuciscus splendidus
NC_027164.1	Coreoperca herzi
NC_009868.1	Coreoperca kawamebari
NC_024431.1	Coreoperca loona
NC_023957.1	Coreoperca whiteheadi
NC_004698.1	Corydoras rabauti
NC_025242.1	Cottus czerskii
NC_024739.1	Cottus dzungaricus
NC_014851.1	Cottus hangiongensis
NC_014849.1	Cottus poecilopus
NC_004404.1	Cottus reinii
NC_008280.1	Cranoglanis bouderius
NC_017884.1	Crenimugil crenilabis
NC_021599.1	Creteuchiloglanis kamengensis
NC_007881.1	Cromeria occidentalis
NC_021614.1	Cromileptes altivelis
NC_022446.1	Crossorhombus azureus
NC_024949.1	Crossorhombus kobensis
NC_013880.1	Cryptopsaras couesii
NC_010288.1	Ctenopharyngodon idella
NC_013150.1	Cubiceps pauciradiatus
NC_011577.1	Culaea inconstans
NC_013616.1	Culter alburnus
NC_024749.1	Culter erythropterus
NC_024277.1	Culter recurviceps
NC_024183.1	Cultrichthys compressocorpus
NC_025951.1	Curimata mivartii
NC_008645.1	Cycleptus elongatus
NC_023231.1	Cyclocheilichthys enoplos
NC_024950.1	Cyclopsetta fimbriata
NC_013609.1	Cyema atrum
NC_009059.1	Cymatogaster aggregata
NC_014881.1	Cynoglossus abbreviatus
NC_023230.1	Cynoglossus lineolatus
NC_023226.1	Cynoglossus bilineatus
NC_023446.1	Cynoglossus itinus
NC_023229.1	Cynoglossus puncticeps
NC_012825.1	Cynoglossus semilaevis
NC_023224.1	Cynoglossus sinicus
NC_026230.1	Cynoglossus trigrammus
NC_013617.1	Cynoponticus ferox
NC_018564.1	Cynotilapia afra
NC_015105.1	Cyphomyrus discorhynchus
NC_008643.1	Cyprinella lutrensis
NC_008103.1	Cyprinella spiloptera
NC_009125.2	Cyprinodon rubrofluviatilis
NC_018366.1	Cyprinus carpio 'color'
NC_001606.1	Cyprinus carpio
NC_018035.1	Cyprinus carpio carpio
NC_018037.1	Cyprinus carpio haematopterus
NC_018039.1	Cyprinus carpio 'wuyuanensis'
NC_018036.1	Cyprinus carpio 'xingguonensis'
NC_007403.1	Cypselurus hiraii
NC_024189.1	Dactyloptena orientalis
NC_003194.1	Dactyloptena peterseni
NC_004402.1	Dactyloptena tiltoni
NC_004592.1	Dallia pectoralis
NC_003185.1	Danacetichthys galathenus
NC_015525.1	Danio dangila
NC_027688.1	Danio nigrofasciatus
NC_002333.2	Danio rerio
NC_021132.1	Dasyatis akajei
NC_020352.2	Dasyatis bennetti
NC_019643.1	Dasyatis zugei
NC_026718.1	Decapterus macarellus
NC_023458.1	Decapterus macrosoma
NC_024556.1	Decapterus maruadsi
NC_017606.1	Dendrophysa russelii
NC_007889.1	Denticeps clupeoides
NC_013611.1	Derichthys serpentinus
NC_026122.1	Devario laoensis
NC_009856.1	Diagramma picta
NC_003164.1	Diaphus splendidus
NC_026074.1	Dicentrarchus labrax
NC_026075.1	Dicentrarchus punctatus
NC_013870.1	Diceratias pileatus
NC_018561.1	Dimidiochromis compressiceps
NC_009866.1	Diodon holocanthus
NC_004376.1	Diplacanthopoma brachysoma
NC_015823.1	Diplomystes nahuelbutaensis
NC_002647.1	Diplophos taenia
NC_026897.1	Diploprion bifasciatum
NC_018556.1	Diplotaxodon limnothrissa
NC_023505.2	Dipturus kwangtungensis
NC_027521.1	Dipturus trachyderma
NC_025650.1	Diptychus maculatus
NC_008126.1	Diretmoides veriginae
NC_008127.1	Diretmus argenteus
NC_024578.1	Discogobio tetrabarbatus
NC_025319.1	Discogobio yunnanensis
NC_018135.1	Dissostichus eleginoides
NC_015836.1	Distichodus sexfasciatus
NC_011208.1	Distoechodon tumirostris
NC_009060.1	Ditrema temminckii
NC_009867.1	Doederleinia berycoides
NC_008107.1	Dorosoma cepedianum
NC_009580.1	Dorosoma petenense
NC_024187.1	Doryrhamphus japonicus
NC_024185.1	Draconetta xenica
NC_026791.1	Drepane longimana
NC_025633.1	Drepane punctata
NC_022482.1	Dysalotus alcocki
NC_022508.1	Echeneis naucrates
NC_016717.1	Ehirava fluviatilis
NC_004701.1	Eigenmannia sp.
NC_003175.1	Elassoma evergladei
NC_011388.1	Elassoma zonatum
NC_004415.1	Eleotris acanthopoma
NC_026902.1	Eleotris oxycephala
NC_021620.1	Eleutheronema tetradactylum
NC_024834.1	Elopichthys bambusa
NC_005798.1	Elops hawaiensis
NC_005803.1	Elops saurus
NC_004407.1	Emmelichthys struhsakeri
NC_027234.1	Enchelynassa canina
NC_009581.1	Engraulis encrasicolus
NC_003097.1	Engraulis japonicus
NC_022147.1	Enophrys diceraus
NC_013181.1	Enoplosus armatus
NC_027733.1	Ephippus orbis
NC_011113.1	Epinephelus akaara
NC_020785.1	Epinephelus areolatus
NC_018773.1	Epinephelus awoara
NC_022848.1	Epinephelus bleekeri
NC_013820.1	Epinephelus bruneus
NC_011111.1	Epinephelus coioides
NC_026731.1	Epinephelus corallicola
NC_021462.1	Epinephelus epistictus
NC_020782.1	Epinephelus fasciatomaculosus
NC_020046.1	Epinephelus fuscoguttatus
NC_011715.1	Epinephelus lanceolatus
NC_020784.1	Epinephelus latifasciatus
NC_022509.1	Epinephelus merra
NC_017891.1	Epinephelus moara
NC_021450.1	Epinephelus quoyanus
NC_013829.1	Hyporthodus septemfasciatus
NC_021765.1	Epinephelus sexfasciatus
NC_021133.1	Epinephelus stictus
NC_021612.1	Epinephelus trimaculatus
NC_024039.1	Epinephelus tukula
NC_022505.1	Epinnula magistralis
NC_026889.1	Erilepis zonifer
NC_013064.1	Erimyzon oblongus
NC_005251.1	Erpetoichthys calabaricus
NC_016706.1	Escualosa thoracata
NC_008660.1	Esomus metallicus
NC_004593.1	Esox lucius
NC_023269.1	Esox reichertii
NC_005254.2	Etheostoma radiosum
NC_009582.1	Ethmalosa fimbriata
NC_016710.1	Ethmidium maculatum
NC_011179.1	Etroplus maculatus
NC_009583.1	Etrumeus teres
NC_011953.1	Eubalichthys mosaicus
NC_021598.1	Euchiloglanis kishinouyei
NC_025582.1	Eudontomyzon morii
NC_022485.1	Eumegistus illustris
NC_010264.1	Eurypegasus draconis
NC_005299.1	Eurypharynx pelecanoides
NC_012043.1	Eutaeniophorus festivus
NC_004390.1	Eutaeniophorus sp.
NC_025934.1	Euthynnus affinis
NC_004530.1	Euthynnus alletteratus
NC_022495.1	Evoxymetopon poeyi
NC_003184.1	Exocoetus volitans
NC_021601.1	Exostoma labiatum
NC_013621.1	Facciolella oxyrhyncha
NC_010274.1	Fistularia commersonii
NC_024190.1	Fistularia petimba
NC_001727.1	Formosania lacustris
NC_012361.1	Fundulus diaphanus
NC_012377.1	Fundulus grandis
NC_012312.1	Fundulus heteroclitus
NC_011380.1	Fundulus olivaceus
NC_024848.1	Gadopsis bispinosus
NC_024436.1	Gadopsis marmoratus
NC_004449.1	Gadus chalcogrammus
NC_002081.1	Gadus morhua
NC_012323.1	Gadus ogac
NC_021596.1	Gagata dolichonema
NC_015239.1	Galaxias gollumoides
NC_004594.1	Galaxias maculatus
NC_015240.1	Galaxias sp.
NC_008448.1	Galaxiella nigrostriata
NC_022193.1	Galeocerdo cuvier
NC_004388.1	Gambusia affinis
NC_022953.1	Garra flavatra
NC_025562.1	Garra imberba
NC_021935.1	Garra orientalis
NC_022941.1	Garra rufa
NC_022944.1	Garra spilota
NC_020671.1	Gasterochisma melampus
NC_011570.1	Gasterosteus wheatlandi
NC_026232.1	Gazza minuta
NC_027597.1	Genicanthus bellus
NC_027596.1	Genicanthus semifasciatus
NC_018562.1	Genyochromis mento
NC_015086.1	Genyomyrus donnyi
NC_026234.1	Gerres oyena
NC_013885.1	Gigantactis vanhoeffeni
NC_013761.1	Gila conspersa
NC_008105.1	Gila robusta
NC_012906.1	Gillichthys mirabilis
NC_012908.1	Gillichthys seta
NC_013137.1	Girella punctata
NC_021600.1	Glaridoglanis andersonii
NC_004595.1	Glossanodon semifasciatus
NC_018824.1	Glossogobius circumspectus
NC_016664.1	Glossogobius olivaceus
NC_023361.1	Glyphis garricki
NC_021768.2	Glyphis glyphis
NC_021597.1	Glyptosternon maculatum
NC_018769.1	Glyptothorax fokiensis fokiensis
NC_024672.1	Glyptothorax sinensis
NC_021608.1	Glyptothorax trilineatus
NC_012717.2	Gnathonemus petersii
NC_008649.1	Gnathopogon elongatus
NC_027255.1	Gnathopogon imberbis
NC_024837.1	Gnathopogon polytaenia
NC_022189.1	Gnathopogon strigatus
NC_027270.1	Gnathopogon taeniellus
NC_008662.1	Gobio gobio
NC_014878.1	Gobiobotia brevibarba
NC_022931.1	Gobiobotia intermedia
NC_014877.1	Gobiobotia macrocephala
NC_020464.1	Gobiobotia naktongensis
NC_018099.1	Gobiocypris rarus
NC_011018.1	Gonorynchus abbreviatus
NC_004702.1	Gonorynchus greyi
NC_024108.1	Grammistes sexlineatus
NC_007890.1	Grasseichthys gabonensis
NC_026195.1	Grundulus bogotensis
NC_016715.1	Gudusia chapra
NC_012707.1	Gymnarchus niloticus
NC_025785.1	Gymnocephalus cernua
NC_021419.1	Gymnocypris dobula
NC_019605.1	Gymnocypris eckloni
NC_021420.1	Gymnocypris namensis
NC_008661.1	Gymnocypris przewalskii
NC_019604.1	Gymnocypris przewalskii ganzihonensis
NC_023793.1	Gymnodiptychus pachycheilus
NC_008743.1	Gymnogobius petschiliensis
NC_027240.1	Gymnomuraena zebra
NC_015754.1	Gymnorhamphichthys sp.
NC_022496.1	Gymnosarda unicolor
NC_004417.1	Gymnothorax kidako
NC_024102.1	Gymnura poecilura
NC_008672.1	Gyrinocheilus aymonieri
NC_012050.1	Gyrinomimus myersi
NC_012049.1	Gyrinomimus sp.
NC_009066.1	Halichoeres melanurus
NC_011191.1	Halichoeres tenuispinis
NC_011199.1	Halichoeres trimaculatus
NC_019646.1	Hapalogenys analis
NC_014404.1	Hapalogenys nigripinnis
NC_027289.1	Haplochromis burtoni
NC_013865.1	Haplophryne mollis
NC_016667.1	Harengula jaguana
NC_003161.1	Harpadon microchir
NC_019645.1	Harpadon nehereus
NC_014292.1	Harriotta raleighana
NC_022724.1	Hasemania nana
NC_020349.1	Helicolenus avius
NC_003195.1	Helicolenus hilgendorfi
NC_022728.1	Helostoma temminkii
NC_023976.1	Hemibagrus guttatus
NC_019592.1	Hemibagrus macropterus
NC_024273.1	Hemibagrus nemurus
NC_023222.1	Hemibagrus spilopterus
NC_024278.1	Hemibagrus wyckioides
NC_008644.1	Hemibarbus barbus
NC_007785.2	Hemibarbus labeo
NC_007784.2	Hemibarbus longirostris
NC_018534.1	Hemibarbus maculatus
NC_024527.1	Hemibarbus medius
NC_007786.2	Hemibarbus mylodon
NC_022192.1	Hemibarbus umbrifer
NC_022929.1	Hemiculter leucisculus
NC_026693.1	Hemiculterella sauvagei
NC_015548.1	Hemigrammocypris rasborella
NC_015816.1	Hemiodopsis gracilis
NC_026774.1	Hemitriakis japanica
NC_022950.1	Henicorhynchus lineatus
NC_009871.1	Heniochus diphreutes
NC_015819.1	Hepsetus odoe
NC_022730.1	Heptranchias perlo
NC_013555.1	Herwigia kreffti
NC_013629.1	Heteroconger hassi
NC_003137.1	Heterodontus francisci
NC_021615.1	Heterodontus zebra
NC_024921.1	Heteromycteris japonicus
NC_015827.1	Heteropneustes fossilis
NC_023470.1	Heterotilapia buttikoferi
NC_015081.1	Heterotis niloticus
NC_021459.1	Hexagrammos agrammus
NC_026888.1	Hexagrammos lagocephalus
NC_022732.1	Hexanchus griseus
NC_022733.1	Hexanchus nakamurai
NC_013867.1	Himantolophus albinares
NC_013868.1	Himantolophus groenlandicus
NC_027649.1	Himantura dalyensis
NC_026208.1	Himantura gerrardi
NC_023525.1	Himantura granulata
NC_027497.1	Himantura hortlei
NC_026285.1	Himantura microphthalma
NC_005145.1	Hiodon alosoides
NC_015082.1	Hiodon tergisus
NC_024536.1	Hippocampus barbouri
NC_020336.1	Hippocampus comes
NC_022722.1	Hippocampus erectus
NC_021454.1	Hippocampus histrix
NC_024530.1	Hippocampus ingens
NC_010272.1	Hippocampus kuda
NC_021107.1	Hippocampus trimaculatus
NC_009709.1	Hippoglossus hippoglossus
NC_009710.1	Hippoglossus stenolepis
NC_015786.1	Histiopterus typus
NC_027585.1	Holacanthus africanus
NC_027595.1	Holacanthus ciliaris
NC_026453.1	Holacanthus clarionensis
NC_027594.1	Holacanthus passer
NC_027586.1	Holacanthus tricolor
NC_008673.1	Pseudohomaloptera leonardi
NC_025321.1	Homatula potanini
NC_020095.1	Homatula variegata
NC_021963.1	Hongeo koreana
NC_024197.1	Hoplolatilus cuniculus
NC_003187.1	Hoplostethus japonicus
NC_013623.1	Hoplunnis punctata
NC_015544.1	Horadandia atukorali
NC_024852.1	Howella brodiei
NC_015995.1	Hucho bleekeri
NC_025589.1	Hucho hucho
NC_016426.1	Hucho taimen
NC_023837.1	Huso dauricus
NC_005252.1	Huso huso
NC_014290.1	Hydrolagus lemures
NC_015813.1	Hydrolycus scomberoides
NC_008676.1	Hypentelium nigricans
NC_016671.1	Hyperlophus vittatus
NC_013149.1	Hyperoglyphe japonica
NC_004386.1	Hypoatherina tsurugae
NC_015242.1	Hypomesus nipponensis
NC_026566.1	Hypomesus olidus
NC_010156.1	Hypophthalmichthys molitrix
NC_010194.1	Hypophthalmichthys nobilis
NC_013832.1	Hypoplectrus gemma
NC_004400.1	Hypoptychus dybowskii
NC_026467.1	Hyporhamphus intermedius
NC_011173.1	Hyporhamphus sajori
NC_020047.1	Hyporthodus octofasciatus
NC_025584.1	Hypostomus plecostomus
NC_011168.1	Hypselecara temporalis
NC_027587.1	Icelus spatula
NC_015752.1	Ichthyborus sp.
NC_025950.1	Ichthyoelephas longirostris
NC_025552.1	Ichthyomyzon fossor
NC_025553.1	Ichthyomyzon unicuspis
NC_003489.1	Ictalurus punctatus
NC_013071.1	Ictiobus bubalus
NC_026528.1	Ictiobus cyprinellus
NC_003179.1	Ijimaia dofleini
NC_009584.1	Ilisha africana
NC_009585.1	Ilisha elongata
NC_013634.1	Ilyophis brunneus
NC_004401.1	Indostomus paradoxus
NC_008667.1	Ischikauia steenackeri
NC_011178.1	Iso hawaiiensis
NC_022478.1	Istiophorus albicans
NC_012676.1	Istiophorus platypterus
NC_022691.1	Isurus oxyrinchus
NC_024101.1	Isurus paucus
NC_006917.1	Jenkinsia lamprotaenia
NC_015076.1	Jenkinsia sp.
NC_024606.1	Jinshaia abbreviata
NC_024598.1	Jinshaia sinensis
NC_022464.1	Johnius belangerii
NC_011387.1	Jordanella floridae
NC_022488.1	Kali indica
NC_003176.1	Kareius bicoloratus
NC_005316.1	Katsuwonus pelamis
NC_013607.1	Kaupichthys hyoproroides
NC_009864.1	Kentrocapros aculeatus
NC_027166.1	Kichulchoia multifasciata
NC_007882.1	Kneria sp.
NC_016694.1	Konosirus punctatus
NC_015798.1	Koreocobitis naktongensis
NC_018755.1	Koreocobitis rotundicaudata
NC_003290.1	Kryptolebias marmoratus
NC_013142.1	Kuhlia mugil
NC_022477.1	Kurtus gulliveri
NC_013138.1	Kyphosus cinerascens
NC_022945.1	Labeo angra
NC_015193.1	Labeo bata
NC_008656.1	Labeo batesii
NC_017614.1	Labeo calbasu
NC_022942.1	Labeo chrysophekadion
NC_022949.1	Labeo cyclorhynchus
NC_026217.1	Labeo fimbriatus
NC_022956.1	Labeo lineatus
NC_022943.1	Labeo pierrei
NC_017608.1	Labeo rohita
NC_008657.1	Labeo senegalensis
NC_013626.2	Labichthys carinatus
NC_022954.1	Labiobarbus leptocheilus
NC_022955.1	Labiobarbus lineatus
NC_022947.1	Labiobarbus ocellatus
NC_009054.1	Labracinus cyclophthalmus
NC_013139.1	Labracoglossa argentiventris
NC_011330.1	Lactoria diaphana
NC_024634.1	Ladislavia taczanowskii
NC_024951.1	Laeops lanceolata
NC_015345.1	Lagocephalus laevigatus
NC_015343.1	Lagocephalus lagocephalus
NC_013360.1	Lagocephalus lunaris
NC_015340.1	Lagocephalus sceleratus
NC_026194.2	Lagocephalus spadiceus
NC_026229.1	Lagocephalus suezensis
NC_011637.1	Lagocephalus wheeleri
NC_024269.1	Lamna ditropis
NC_020151.1	Lampadena atlantica
NC_026917.1	Lampetra aepyptera
NC_025583.1	Lampetra appendix
NC_001131.1	Lampetra fluviatilis
NC_003165.1	Lampris guttatus
NC_004378.1	Lamprogrammus niger
NC_011710.1	Larimichthys crocea
NC_013754.1	Larimichthys polyactis
NC_018045.1	Lateolabrax maculatus
NC_007439.1	Lates calcarifer
NC_001804.1	Latimeria chalumnae
NC_006921.2	Latimeria menadoensis
NC_015750.1	Lebiasina astrigata
NC_004696.1	Lefua echigonia
NC_027662.1	Lefua nikkonis
NC_021394.1	Pseudobagrus crassilabris
NC_014586.1	Leiocassis longirostris
NC_015365.1	Leiodon cutcutia
NC_024952.1	Lepidoblepharon ophthalmolepis
NC_003342.1	Lepidosiren paradoxa
NC_004744.1	Lepisosteus oculatus
NC_008104.1	Lepisosteus osseus
NC_020359.1	Lepomis cyanellus
NC_015984.2	Lepomis macrochirus
NC_025767.1	Leporinus piavussu
NC_015528.1	Leptobarbus hoevenii
NC_018764.1	Leptobotia elongata
NC_008677.1	Leptobotia mantschurica
NC_024049.1	Leptobotia microphthalma
NC_022851.1	Leptobotia rubrilabris
NC_026130.1	Leptobotia taeniops
NC_013615.1	Leptocephalus sp.
NC_011006.1	Leptochilichthys agassizii
NC_027588.1	Leptoclinus maculatus
NC_013557.1	Leptoderma lubricum
NC_015100.1	Leptoderma macrophthalmum
NC_013559.1	Leptoderma retropinna
NC_024609.1	Lepturichthys fimbriata
NC_020465.1	Lethenteron camtschaticum
NC_014270.1	Lethenteron reissneri
NC_009855.1	Lethrinus obsoletus
NC_020357.1	Leucaspius delineatus
NC_024528.1	Leuciscus baicalensis
NC_018825.1	Leuciscus waleckii
NC_016429.1	Leucoraja erinacea
NC_023539.1	Liachirus melanospilos
NC_021602.1	Liobagrus anguillicauda
NC_020337.1	Liobagrus kingi
NC_021122.1	Liobagrus marginatoides
NC_022923.1	Liobagrus marginatus
NC_027167.1	Liobagrus mediadiposalis
NC_021407.1	Liobagrus nigricauda
NC_008232.1	Liobagrus obesus
NC_004591.1	Lipolagus ochotensis
NC_017887.1	Liza affinis
NC_024531.1	Liza haematocheila
NC_027239.1	Liza macrolepis
NC_026233.1	Lobotes surinamensis
NC_013872.1	Lophiodes caulinaris
NC_020783.1	Lophiogobius ocellicauda
NC_008125.1	Lophiomus setigerus
NC_026845.1	Lophiosilurus alexandri
NC_004380.1	Lophius americanus
NC_023828.1	Lophius litulon
NC_004379.1	Lota lota
NC_020338.1	Luciobarbus capito
NC_027062.1	Luciogobius pallidus
NC_019811.1	Luciogobius platycephalus
NC_015541.1	Luciosoma bleekeri
NC_016661.1	Lutjanus argentimaculatus
NC_011275.1	Lutjanus bengalensis
NC_024572.1	Lutjanus johnii
NC_011578.1	Lutjanus kasmira
NC_012736.1	Lutjanus malabaricus
NC_009869.1	Lutjanus rivulatus
NC_010963.1	Lutjanus russellii
NC_012737.1	Lutjanus sebae
NC_009851.1	Luvarus imperialis
NC_014279.1	Lycengraulis grossidens
NC_004409.1	Lycodes toyamensis
NC_014277.1	Lycothrissa crocodilus
NC_023807.1	Maccullochella peelii
NC_024849.1	Macquaria ambigua
NC_023383.1	Macquaria australasica
NC_015551.1	Macrochirichthys macrochirus
NC_027435.1	Macrognathus aculeatus
NC_024753.1	Macropodus ocellatus
NC_025932.1	Macropodus opercularis
NC_010265.1	Macroramphosus scolopax
NC_009860.1	Macrorhamphosodes uradoi
NC_012675.1	Istiompax indica
NC_012680.1	Makaira mazara
NC_015833.1	Malapterurus electricus
NC_015244.1	Mallotus villosus
NC_015090.1	Marcusenius senegalensis
NC_015351.1	Marilyna darwinii
NC_023977.1	Mastacembelus armatus
NC_003193.1	Mastacembelus favus
NC_005837.1	Masturus lanceolatus
NC_011007.1	Maulisia mauli
NC_021442.1	Megachasma pelagios
NC_025565.1	Megalaspis cordyla
NC_010341.1	Megalobrama amblycephala
NC_026458.1	Megalobrama pellegrini
NC_024422.1	Megalobrama skolkovii
NC_018816.1	Megalobrama terminalis
NC_005804.1	Megalops atlanticus
NC_005799.1	Megalops cyprinoides
NC_013866.1	Melanocetus johnsonii
NC_004384.1	Melanocetus murrayi
NC_007396.1	Melanogrammus aeglefinus
NC_004385.1	Melanotaenia lacustris
NC_026904.1	Melanotaenia parkinsoni
NC_011937.1	Melichthys vidua
NC_011174.1	Menidia menidia
NC_007395.1	Merlangius merlangus
NC_015120.1	Merluccius merluccius
NC_022181.1	Mesocottus haitej
NC_025297.1	Metahomaloptera omeiensis
NC_022458.1	Metzia formosae
NC_024729.1	Metzia longinasus
NC_023797.1	Metzia mesembrinum
NC_011956.1	Meuschenia hippocrepis
NC_015753.1	Micralestes sp.
NC_013182.1	Microcanthus strigatus
NC_024201.1	Microdevario kubotai
NC_015546.1	Microdevario nana
NC_015102.1	Micromesistius poutassou
NC_021763.1	Micropercops swinhonis
NC_010273.1	Oostethus brachyurus
NC_021451.1	Microphysogobio alticorpus
NC_022704.1	Microphysogobio brevirostris
NC_024930.1	Microphysogobio fukiensis
NC_014880.1	Microphysogobio koreensis
NC_022191.1	Microphysogobio longidorsalis
NC_023461.1	Microphysogobio tafangensis
NC_027165.1	Microphysogobio yaluensis
NC_011361.1	Micropterus dolomieu
NC_014689.1	Micropterus floridanus
NC_008106.1	Micropterus salmoides
NC_014686.1	Micropterus salmoides salmoides
NC_016695.1	Microthrissa congica
NC_016683.1	Microthrissa royauxi
NC_014351.1	Miichthys miiuy
NC_008113.1	Minytrema melanops
NC_011209.1	Misgurnus anguillicaudatus
NC_022854.1	Misgurnus bipartitus
NC_022712.1	Misgurnus mohoity
NC_008678.1	Misgurnus nikolskyi
NC_011825.1	Mitsukurina owstoni
NC_025954.1	Mobula eregoodootenkee
NC_018784.1	Mobula japanica
NC_024058.1	Mogurnda adspersa
NC_005836.1	Mola mola
NC_011925.1	Monacanthus chinensis
NC_004392.1	Monocentris japonicus
NC_009858.1	Monodactylus argenteus
NC_013612.1	Monognathus jesperseni
NC_003192.1	Monopterus albus
NC_010957.1	Monotaxis grandoculis
NC_015366.1	Monotrete cochinchinensis
NC_022940.1	Monotrete leiurus
NC_017902.2	Moolgarda cunnesius
NC_013622.1	Moringua edwardsi
NC_013602.1	Moringua microchir
NC_014353.1	Morone saxatilis
NC_013074.1	Moxostoma congestum
NC_008674.1	Moxostoma poecilurum
NC_003182.1	Mugil cephalus
NC_017889.1	Mugil curema
NC_023353.1	Mugilogobius abei
NC_026519.1	Mugilogobius chulae
NC_024188.1	Mulloidichthys vanicolensis
NC_013614.1	Muraenesox bagio
NC_023527.1	Mustelus griseus
NC_000890.1	Mustelus manazo
NC_003163.1	Myctophum affine
NC_015751.1	Myleus sp.
NC_013763.1	Mylocheilus caurinus
NC_011141.1	Mylopharyngodon piceus
NC_015089.1	Myomyrus macrops
NC_013635.1	Myrichthys maculosus
NC_003189.1	Myripristis berndti
NC_013631.1	Myroconger compressus
NC_023106.1	Mystacoleucus marginatus
NC_023223.1	Mystus rhegma
NC_006401.1	Myxocyprinus asiaticus
NC_017892.1	Myxus capensis
NC_015542.1	Nannoperca australis
NC_015545.1	Nannoperca obscura
NC_024851.1	Nannoperca variegata
NC_004596.1	Nansenia ardesiaca
NC_011008.1	Narcetes erimelas
NC_013560.1	Narcetes stomias
NC_025512.1	Narcine entemedor
NC_009853.1	Naso lopezi
NC_011921.1	Nelusetta ayraudi
NC_021447.1	Nematalosa come
NC_009586.1	Nematalosa japonica
NC_023824.1	Nematalosa nasus
NC_013620.1	Nemichthys scolopaceus
NC_023972.1	Nemipterus japonicus
NC_027734.1	Nemipterus virgatus
NC_024953.1	Neoachiropsetta milfordi
NC_013864.1	Neoceratias spinifer
NC_003127.1	Neoceratodus forsteri
NC_004399.1	Neocyttus rhomboidalis
NC_009062.1	Neolamprologus brichardi
NC_026106.1	Neolissochilus hexagonolepis
NC_019629.1	Neosalanx taihuensis
NC_026455.1	Neosalanx tangkahkeii
NC_020150.1	Neoscopelus macrolepidotus
NC_003180.1	Neoscopelus microchir
NC_024193.1	Neosynchiropus moyeri
NC_021767.1	Neotrygon kuhlii
NC_022490.1	Nesiarchus nasutus
NC_013608.1	Nessorhamphus ingolfianus
NC_013625.1	Nettastoma parviceps
NC_015205.1	Nibea albiflora
NC_025307.1	Nibea coibor
NC_015538.1	Nicholsicypris normalis
NC_018558.1	Nimbochromis linni
NC_025286.1	Nipponocypris koreanus
NC_027664.1	Nipponocypris temminckii
NC_015307.1	Niwaella delicata
NC_011009.1	Normichthys operosus
NC_005144.1	Notacanthus chemnitzii
NC_008646.1	Notemigonus crysoleucas
NC_011814.1	Nothobranchius furzeri
NC_012713.1	Notopterus notopterus
NC_022731.1	Notorynchus cepedianus
NC_015653.1	Notothenia coriiceps
NC_008110.1	Notropis stramineus
NC_022455.1	Novumbra hubbsi
NC_025646.1	Ochetobius elongatus
NC_009061.1	Olisthops cyanomelas
NC_016678.1	Odaxothrissa losera
NC_009590.1	Odaxothrissa vittata
NC_019647.1	Odontamblyopus rubicundus
NC_011175.1	Odontesthes sp. Odsp-001
NC_027583.1	Odontobutis interrupta
NC_010199.1	Odontobutis platycephala
NC_022706.1	Odontobutis potamophila
NC_022818.1	Odontobutis sinensis
NC_027160.1	Odontobutis yaluensis
NC_011938.1	Odonus niger
NC_017893.1	Oedalechilus labeo
NC_025941.1	Oedalechilus labiosus
NC_007173.1	Okamejei kenojei
NC_015349.1	Omegophora armilla
NC_006897.1	Oncorhynchus clarkii henshawi
NC_010959.1	Oncorhynchus gorbuscha
NC_017838.1	Oncorhynchus keta
NC_009263.1	Oncorhynchus kisutch
NC_009262.1	Oncorhynchus masou 'Biwa'
NC_008745.1	Oncorhynchus masou formosanus
NC_008746.1	Oncorhynchus masou ishikawae
NC_008747.1	Oncorhynchus masou masou
NC_001717.1	Oncorhynchus mykiss
NC_008615.1	Oncorhynchus nerka
NC_002980.1	Oncorhynchus tshawytscha
NC_013871.1	Oneirodes thompsoni
NC_021473.1	Onychostoma alticorpus
NC_021644.1	Onychostoma barbatulum
NC_019630.1	Onychostoma barbatum
NC_026549.1	Onychostoma gerlachi
NC_018043.1	Onychostoma lini
NC_023799.1	Onychostoma macrolepis
NC_022869.1	Onychostoma rara
NC_021972.1	Onychostoma simum
NC_026887.1	Ophiodon elongatus
NC_005802.1	Ophisurus macrorhynchos
NC_004600.1	Opisthoproctus soleatus
NC_017895.1	Opistognathus jacksoniensis
NC_010968.1	Oplegnathus fasciatus
NC_013143.1	Oplegnathus punctatus
NC_008744.1	Opsariichthys bidens
NC_008652.1	Opsariichthys uncirostris
NC_022148.1	Orectolobus japonicus
NC_013750.1	Oreochromis aureus
NC_025555.1	Oreochromis esculentus
NC_007231.1	Oreochromis mossambicus
NC_013663.1	Oreochromis niloticus
NC_014060.1	Oreochromis sp. 'red tilapia'
NC_009057.1	Oreochromis sp. KM-2006
NC_026109.1	Oreochromis variabilis
NC_021607.1	Oreoglanis macropterus
NC_018817.1	Oreoleuciscus potanini
NC_027582.1	Orestias ascotanensis
NC_012976.1	Oryzias dancena
NC_012981.1	Oryzias javanicus
NC_004387.1	Oryzias latipes
NC_012979.1	Oryzias luzonensis
NC_018546.1	Oryzias melastigma
NC_012975.1	Oryzias minutillus
NC_013434.1	Oryzias sinensis
NC_015246.1	Osmerus mordax
NC_022946.1	Osteochilus nashii
NC_021385.1	Osteochilus salsburyi
NC_022951.1	Osteochilus schlegelii
NC_003095.1	Osteoglossum bicirrhosum
NC_004394.1	Ostichthys japonicus
NC_009865.1	Ostracion immaculatus
NC_016194.1	Oxuderces dentatus
NC_026886.1	Oxyeleotris lineolata
NC_024565.1	Oxyeleotris marmorata
NC_022718.1	Oxygymnocypris stewartii
NC_011927.1	Oxymonacanthus longirostris
NC_020345.1	Oxyurichthys formosanus
NC_020436.1	Paedocypris progenetica
NC_009502.1	Pagellus bogaraveo
NC_005146.1	Pagrus auriga
NC_003196.1	Pagrus major
NC_023466.1	Pampus argenteus
NC_024044.1	Pampus chinensis
NC_023258.1	Pampus echinogaster
NC_022501.1	Pampus punctatissimus
NC_011707.1	Pampus sp.
NC_006381.1	Pangasianodon gigas
NC_021752.1	Pangasianodon hypophthalmus
NC_015839.1	Pangasius larnaudii
NC_023924.1	Pangasius pangasius
NC_008675.1	Pangio anguillaris
NC_003096.1	Pantodon buchholzi
NC_012714.1	Papyrocranus congoensis
NC_026127.1	Parabotia banarescui
NC_026128.1	Parabotia fasciata
NC_022678.1	Parabramis pekinensis
NC_024430.1	Paracanthobrama guichenoti
NC_027599.1	Paracentropyge multifasciata
NC_026578.1	Parachaenichthys charcoti
NC_022480.1	Parachanna insignis
NC_023270.1	Paracheirodon axelrodi
NC_026918.1	Parachromis managuensis
NC_022512.1	Paracirrhites arcatus
NC_013630.1	Paraconger notialis
NC_021651.1	Parahucho perryi
NC_009459.2	Parajulis poecilepterus
NC_007891.1	Parakneria cameronensis
NC_015194.1	Paralaubuca typus
NC_002386.1	Paralichthys olivaceus
NC_011929.1	Paraluteres prionurus
NC_023803.1	Paramisgurnus dabryanus
NC_011931.1	Paramonacanthus choirocephalus
NC_015107.1	Paramormyrops gabonensis
NC_023526.1	Paraneetroplus synspilus
NC_023227.1	Paraplagusia bilineata
NC_023228.1	Paraplagusia blochii
NC_021376.1	Paraplagusia japonica
NC_009857.1	Parapristipoma trilineatum
NC_019621.1	Pararasbora moltrechti
NC_008616.1	Parargyrops edita
NC_025947.1	Parasinilabeo assimilis
NC_012044.1	Parataeniophorus gulosus
NC_011170.1	Paratilapia polleni
NC_023786.1	Parazacco spilurus
NC_004396.1	Parazen pacificus
NC_023974.1	Pardachirus pavoninus
NC_011177.1	Paretroplus maculatus
NC_021603.1	Pareuchiloglanis gracilicaudata
NC_024434.1	Pareuchiloglanis sinensis
NC_015837.1	Pareutropius debauwi
NC_024192.1	Parupeneus multifasciatus
NC_023808.1	Pastinachus atrus
NC_024599.1	Pavoraja nitida
NC_010271.1	Pegasus volitans
NC_015353.1	Pelagocephalus marki
NC_008663.1	Pelecus cultratus
NC_014268.1	Pellona flavipinnis
NC_009591.1	Pellonula leonensis
NC_026284.1	Pelotretis flavilatus
NC_018768.1	Tachysurus eupogon
NC_015888.1	Tachysurus fulvidraco
NC_014859.1	Tachysurus nitidus
NC_014862.1	Tachysurus vachellii
NC_023448.1	Peltorhamphus novaezeelandiae
NC_026237.1	Pempheris schwenkii
NC_015202.1	Pennahia argentata
NC_021758.1	Pentaceros japonicus
NC_022502.1	Peprilus triacanthus
NC_019572.1	Perca flavescens
NC_026313.1	Perca fluviatilis
NC_027745.1	Perca schrenkii
NC_024850.1	Percalates novemaculeata
NC_020350.1	Perccottus glenii
NC_024846.1	Percilia irwini
NC_008111.1	Percina macrolepida
NC_018601.1	Percocypris pingi
NC_003168.1	Percopsis transmontana
NC_011932.1	Pervagor janthinosoma
NC_024835.1	Petenia splendida
NC_022856.1	Pethia conchonius
NC_015098.1	Petrocephalus microphthalmus
NC_015092.1	Petrocephalus soudanensis
NC_018814.1	Petrochromis trewavasae
NC_001626.1	Petromyzon marinus
NC_004411.1	Petroscirtes breviceps
NC_018557.1	Petrotilapia nigra
NC_008112.1	Phenacobius mirabilis
NC_004699.1	Phenacogrammus interruptus
NC_004410.1	Pholis crassispina
NC_015364.1	Chrosomus eos
NC_027273.1	Phoxinus oxycephalus
NC_018818.1	Phoxinus oxycephalus jouyi
NC_015360.1	Rhynchocypris percnurus
NC_008684.1	Rhynchocypris percnurus mantschuricus
NC_015362.1	Rhynchocypris percnurus sachalinensis
NC_020358.1	Phoxinus phoxinus
NC_015357.1	Phoxinus steindachneri
NC_023802.1	Phoxinus ujmonensis
NC_007892.1	Phractolaemus ansorgii
NC_024191.1	Phycodurus eques
NC_004377.1	Physiculus japonicus
NC_025315.1	Piaractus brachypomus
NC_024940.1	Piaractus mesopotamicus
NC_015797.1	Pimelodus pictus
NC_022711.1	Plagiognathops microlepis
NC_013136.1	Platax orbicularis
NC_024580.1	Platax teira
NC_010966.1	Platichthys stellatus
NC_022481.1	Platycephalus indicus
NC_025585.1	Platydoras armatulus
NC_024163.1	Platysmacheilus exiguus
NC_025631.1	Platysmacheilus nudiventris
NC_004597.1	Platytroctes apus
NC_002734.2	Plecoglossus altivelis
NC_024587.1	Plectorhinchus cinctus
NC_025517.1	Plectorhinchus lineatus
NC_027097.1	Plectorhinchus orientalis
NC_027098.1	Plectorhinchus vittatus
NC_021405.1	Plectropomus areolatus
NC_008449.1	Plectropomus leopardus
NC_007230.1	Plesiobatis daviesi
NC_023267.1	Plesiomyzon baotingensis
NC_015652.1	Pleuragramma antarctica
NC_023129.1	Pleurogrammus azonus
NC_023475.1	Pleurogrammus monopterygius
NC_022445.1	Pleuronichthys cornutus
NC_027737.1	Plotosus japonicus
NC_024238.1	Poecilia reticulata
NC_026579.1	Poecilia sphenops
NC_015097.1	Pollachius pollachius
NC_015094.1	Pollachius virens
NC_026235.1	Polydactylus plebeius
NC_027088.1	Polydactylus sextarius
NC_002648.1	Polymixia japonica
NC_003181.1	Polymixia lowei
NC_026236.1	Polynemus paradiseus
NC_004419.1	Polyodon spathula
NC_020651.1	Polypterus ansorgii
NC_020652.1	Polypterus delhezi
NC_020791.1	Polypterus endlicherii
NC_001778.1	Polypterus ornatipinnis
NC_023272.1	Polypterus palmas buettikoferi
NC_020653.1	Polypterus retropinnis
NC_004418.1	Polypterus senegalus senegalus
NC_020654.1	Polypterus teugelsi
NC_020655.1	Polypterus weeksii
NC_015339.1	Polyspina piosae
NC_026304.1	Pomacanthus imperator
NC_026303.1	Pomacanthus xanthometopon
NC_022507.1	Pomatomus saltatrix
NC_025638.1	Ponticola kessleri
NC_006920.1	Porichthys myriaster
NC_003172.1	Poromitra oscitans
NC_016674.1	Potamalosa richmondia
NC_016688.1	Potamothrissa acutirostris
NC_016698.1	Potamothrissa obtusirostris
NC_023116.1	Potamotrygon motoro
NC_024842.1	Premnas biaculeatus
NC_022819.1	Prionace glauca
NC_024110.1	Pristiophorus japonicus
NC_022177.1	Pristipomoides multidens
NC_022821.1	Pristis clavata
NC_027182.1	Pristis pectinata
NC_012047.1	Procetichthys kreffti
NC_027689.1	Prochilodus argenteus
NC_027690.1	Prochilodus costatus
NC_024939.1	Prochilodus lineatus
NC_025770.1	Procypris mera
NC_011192.1	Procypris rabaudi
NC_022491.1	Promethichthys prometheus
NC_020764.1	Prosopium cylindraceum
NC_020763.1	Prosopium williamsoni
NC_024573.1	Protonibea diacanthus
NC_014764.2	Protopterus aethiopicus
NC_018822.1	Protopterus annectens
NC_001708.1	Protopterus dolloi
NC_024109.1	Protosalanx hyalocranius
NC_013144.1	Psenes cyanophrys
NC_021619.1	Psenes pellucidus
NC_021460.1	Psenopsis anomala
NC_005834.1	Psephurus gladius
NC_013183.1	Scophthalmus maximus
NC_020032.1	Psettodes erumei
NC_023973.1	Pseudaesopia japonica
NC_011955.1	Pseudalutarius nasicornis
NC_008681.1	Pseudaspius leptocephalus
NC_021605.1	Pseudecheneis sulcata
NC_021604.1	Pseudexostoma yunnanensis
NC_022726.1	Pseudobagrus albomarginatus
NC_021393.1	Pseudobagrus brevicaudatus
NC_015625.1	Pseudobagrus brevicorpus
NC_024279.1	Pseudobagrus emarginatus
NC_022725.1	Pseudobagrus ondon
NC_004697.1	Pseudobagrus tokiensis
NC_022705.1	Pseudobagrus trilineatus
NC_021395.1	Pseudobagrus truncatus
NC_020344.1	Pseudobagrus ussuriensis
NC_011939.1	Pseudobalistes flavimarginatus
NC_022852.1	Pseudobrama simoni
NC_026216.1	Pseudocarcharias kamoharai
NC_013759.1	Pseudogobio esocinus
NC_022186.1	Pseudogobius javanicus
NC_024588.1	Pseudogyrinocheilus prochilus
NC_020435.1	Pseudohemiculter dispar
NC_012055.1	Pseudolabrus eoethinus
NC_009067.1	Pseudolabrus sieboldi
NC_020462.1	Pseudolaubuca engraulis
NC_026712.1	Pseudolaubuca sinensis
NC_011933.1	Pseudomonacanthus peroni
NC_020016.1	Pseudopentaceros richardsoni
NC_021453.1	Pseudopentaceros wheeleri
NC_026526.1	Pseudoplatystoma magdaleniatum
NC_011161.1	Pseudopungtungia nigra
NC_014873.1	Pseudopungtungia tenuicorpus
NC_021769.1	Pseudorasbora elongata
NC_015614.1	Pseudorasbora parva
NC_008665.1	Pseudorasbora pumila
NC_022447.1	Pseudorhombus cinnamoneus
NC_022735.1	Pseudotriakis microdon
NC_018559.1	Pseudotropheus crabro
NC_011210.1	Psilorhynchus homaloptera
NC_015532.1	Psilorhynchus sucatio
NC_022487.1	Pteraclis aesticola
NC_010205.2	Pteragogus flagellifer
NC_022511.1	Pterapogon kauderni
NC_004408.1	Pterocaesio tile
NC_027107.1	Pterocryptis cochinchinensis
NC_024746.1	Pterois miles
NC_025290.1	Pterois volitans
NC_026535.1	Pterophyllum scalare
NC_024570.1	Pteroplatytrygon violacea
NC_005796.1	Pterothrissus gissu
NC_015747.1	Pterygoplichthys disjunctivus
NC_024294.1	Ptychidio jordani
NC_024537.1	Ptychobarbus dipogon
NC_025303.1	Ptychobarbus kaznakovi
NC_011169.1	Ptychochromoides katria
NC_014893.1	Pungitius kaibarae
NC_011571.1	Pungitius pungitius
NC_014889.1	Pungitius sinensis
NC_008664.1	Pungtungia herzi
NC_018566.1	Sahyadria chalakkudiensis
NC_020096.1	Puntius semifasciolatus
NC_020097.1	Puntius snyderi
NC_010110.1	Puntigrus tetrazona
NC_008658.1	Pethia ticto
NC_015840.1	Pygocentrus nattereri
NC_026545.1	Pygoplites diacanthus
NC_013601.1	Pythonichthys microphthalmus
NC_011219.1	Rachycentron canadum
NC_015547.1	Raiamas guttatus
NC_013764.1	Raiamas senegalensis
NC_025498.1	Raja pulchra
NC_021964.1	Raja rhina
NC_007887.1	Ranzania laevis
NC_024045.1	Rasbora borapetensis
NC_015527.1	Rasbora daniconius
NC_020005.1	Rasbora steineri
NC_025336.1	Rasbora trilineata
NC_015531.1	Rasbora vaterifloris
NC_013485.1	Rastrelliger brachysoma
NC_019624.1	Rastrelliger kanagurta
NC_009711.1	Reinhardtius hippoglossoides
NC_018567.1	Repomucenus curvicornis
NC_004598.1	Retropinna retropinna
NC_022503.1	Rexea nakamurai
NC_023952.1	Rexea solandri
NC_025301.1	Rhabdosargus sarba
NC_018563.1	Rhamphochromis esox
NC_023455.1	Rhincodon typus
NC_011941.1	Rhinecanthus aculeatus
NC_022841.1	Rhinobatos hynnicephalus
NC_023951.1	Rhinobatos schlegelii
NC_014293.1	Rhinochimaera pacifica
NC_024540.1	Rhinogobio cylindricus
NC_024423.1	Rhinogobio typus
NC_022720.1	Rhinogobio ventralis
NC_022692.1	Rhinogobius giurinus
NC_017897.1	Rhinomugil nasutus
NC_013610.1	Rhinomuraena quaesita
NC_027437.1	Rhodeus fangi
NC_024885.1	Rhodeus lighti
NC_011211.1	Rhodeus ocellatus
NC_008642.1	Rhodeus ocellatus kurumeus
NC_025326.1	Rhodeus sericeus
NC_022690.1	Rhodeus shitaiensis
NC_022721.1	Rhodeus sinensis
NC_013709.1	Rhodeus suigensis
NC_007885.1	Rhodeus uyekii
NC_004414.1	Rhyacichthys aspro
NC_013863.1	Rhynchactis macrothrix
NC_019614.1	Phoxinus keumkang
NC_015354.1	Rhynchocypris lagowskii
NC_013141.1	Rhynchopelates oxyrhynchus
NC_023376.1	Rita rita
NC_013633.1	Robinsia catherinae
NC_022930.1	Romanogobio tenuicorpus
NC_003186.1	Rondeletia loricata
NC_011924.1	Rudarius ercodes
NC_022493.1	Ruvettus pretiosus
NC_005298.1	Saccopharynx lavenbergi
NC_011010.1	Sagamichthys abei
NC_021973.1	Sahyadria denisonii
NC_004599.1	Salangichthys microdon
NC_006918.1	Salanx ariakensis
NC_004412.1	Salarias fasciatus
NC_024941.1	Salminus brasiliensis
NC_001960.1	Salmo salar
NC_024032.1	Salmo trutta
NC_010007.1	Salmo trutta trutta
NC_015549.1	Salmophasia bacaila
NC_000861.1	Salvelinus alpinus
NC_024585.1	Salvelinus curilus
NC_000860.1	Salvelinus fontinalis
NC_022844.1	Salvelinus leucomaenis
NC_025903.1	Samaris cristatus
NC_024263.1	Samariscus latus
NC_021444.1	Sander canadensis
NC_026533.1	Sander lucioperca
NC_022934.1	Sarcocheilichthys lacustris
NC_020608.1	Sarcocheilichthys nigripinnis
NC_018786.1	Sarcocheilichthys parvus
NC_022475.1	Sarcocheilichthys sinensis
NC_004694.1	Sarcocheilichthys variegatus microoculus
NC_009592.1	Sardina pilchardus
NC_016726.1	Sardinella albella
NC_009587.1	Sardinella maderensis
NC_002616.1	Sardinops melanostictus
NC_004395.1	Sargocentron rubrum
NC_015611.1	Sarotherodon melanotheron
NC_023980.1	Saurida microlepis
NC_024836.1	Saurida umeyoshii
NC_003162.1	Saurida undosquamis
NC_025940.1	Saurida wanieso
NC_022845.1	Saurogobio dabryi
NC_022187.1	Saurogobio dumerili
NC_004403.1	Scalicus amiscus
NC_018789.1	Scaphiodonichthys acanthopterus
NC_004420.1	Scaphirhynchus cf. albus
NC_017888.1	Scartelaos histophorus
NC_011928.1	Scarus forsteni
NC_011599.1	Scarus ghobban
NC_011343.1	Scarus rubroviolaceus
NC_011936.1	Scarus schlegeli
NC_021968.1	Scatophagus argus
NC_021759.1	Schedophilus velaini
NC_022948.1	Schismatorhynchos nukta
NC_008679.1	Schistura balteata
NC_022866.1	Schizopyge niger
NC_026207.1	Schizopygopsis kialingensis
NC_024880.1	Schizopygopsis malacanthus
NC_026206.1	Schizopygopsis pylzovi
NC_021421.1	Schizopygopsis thermalis
NC_021409.1	Schizopygopsis younghusbandi
NC_017873.1	Schizothorax biddulphi
NC_024621.1	Schizothorax chongi
NC_026205.1	Schizothorax davidi
NC_023979.1	Schizothorax dolichonema
NC_022867.1	Schizothorax esocinus
NC_027670.1	Schizothorax kozlovi
NC_023365.1	Schizothorax labiatus
NC_026294.1	Schizothorax lantsangensis
NC_027162.1	Schizothorax lissolabiatus
NC_020339.1	Schizothorax macropogon
NC_020781.1	Schizothorax oconnori
NC_023531.1	Schizothorax plagiostomus
NC_023829.1	Schizothorax prenanti
NC_023366.1	Schizothorax progastus
NC_024833.1	Schizothorax pseudoaksaiensis
NC_021448.1	Schizothorax richardsonii
NC_020606.1	Schizothorax waltoni
NC_020360.1	Schizothorax wangchiachii
NC_016867.1	Sciaenops ocellatus
NC_007012.1	Scleropages formosus
NC_022836.1	Scleropages jardinii
NC_011926.1	Scobinichthys granulatus
NC_018052.1	Scoliodon macrorhynchos
NC_013725.1	Scomber australasicus
NC_013724.1	Scomber colias
NC_013723.1	Scomber japonicus
NC_006398.1	Scomber scombrus
NC_008109.1	Scomberomorus cavalla
NC_021390.1	Scomberomorus munroi
NC_016420.1	Scomberomorus niphonius
NC_021391.1	Scomberomorus semifasciatus
NC_026994.1	Scombrops boops
NC_020149.1	Scopelengys tristis
NC_003171.1	Scopelogadus mizolepis
NC_027735.1	Scorpaenopsis cirrosa
NC_013140.1	Scorpis lineolata
NC_027171.1	Scortum barcoo
NC_001950.1	Scyliorhinus canicula
NC_027440.1	Sebastes hubbsi
NC_023456.1	Sebastes inermis
NC_023265.1	Sebastes koreanus
NC_026100.1	Sebastes longispinis
NC_027444.1	Sebastes minor
NC_024549.1	Sebastes oblongus
NC_026191.1	Sebastes owstoni
NC_005450.1	Sebastes schlegelii
NC_027445.1	Sebastes steindachneri
NC_027439.1	Sebastes taczanowskii
NC_027447.1	Sebastes thompsoni
NC_027446.1	Sebastes trivittatus
NC_027438.1	Sebastes vulpes
NC_013812.1	Sebastiscus marmoratus
NC_023954.1	Selar crumenophthalmus
NC_026919.1	Selenotoca multifasciata
NC_016870.1	Seriola dumerili
NC_016869.1	Seriola lalandi
NC_016868.1	Seriola quinqueradiata
NC_027183.1	Seriola rivoliana
NC_025665.1	Seriolella porosa
NC_013627.1	Serrivomer beanii
NC_013436.1	Serrivomer sector
NC_020468.1	Setipinna taty
NC_015534.1	Sewellia lineolata
NC_017898.1	Sicamugil cascasia
NC_018826.1	Sicyopterus japonicus
NC_022838.1	Sicyopterus lagocephalus
NC_024881.1	Siganus canaliculatus
NC_009572.1	Siganus fuscescens
NC_024088.1	Siganus guttatus
NC_024086.1	Siganus puellus
NC_013148.1	Siganus unimaculatus
NC_025588.1	Siganus vulpinus
NC_002574.1	Sigmops gracilis
NC_025935.1	Sillago aeolus
NC_025337.1	Sillago asiatica
NC_025298.1	Sillago indica
NC_016672.1	Sillago sihama
NC_015806.1	Silurus asotus
NC_014261.1	Silurus glanis
NC_015650.1	Silurus lanzhouensis
NC_014866.1	Silurus meridionalis
NC_022723.1	Silurus soldatovi
NC_013605.1	Simenchelys parasitica
NC_020327.1	Sinibotia superciliaris
NC_020013.1	Sinibrama macrops
NC_026119.1	Sinibrama taeniatus
NC_015822.1	Siniperca chuatsi
NC_015987.1	Siniperca knerii
NC_021136.1	Siniperca obscura
NC_024432.1	Siniperca roulei
NC_015815.1	Siniperca scherzeri
NC_024433.1	Siniperca undulata
NC_026709.1	Sinobdella sinensis
NC_013186.1	Sinocyclocheilus altishoulderus
NC_023472.1	Sinocyclocheilus anophthalmus
NC_027169.1	Sinocyclocheilus anshuiensis
NC_019995.1	Sinocyclocheilus furcodorsalis
NC_013189.1	Sinocyclocheilus grahami
NC_027168.1	Sinocyclocheilus rhinocerous
NC_011922.1	Sinogastromyzon puliensis
NC_024534.1	Sinogastromyzon sichangensis
NC_008123.1	Sirembo imberbis
NC_013873.1	Sladenia gardineri
NC_024610.1	Solea ovata
NC_008327.1	Solea senegalensis
NC_010267.1	Solenostomus cyanopterus
NC_024186.1	Solenostomus paradoxus
NC_022734.1	Somniosus pacificus
NC_026211.1	Sorubim cuspicaudus
NC_024236.1	Sparus aurata
NC_015344.1	Sphoeroides annulatus
NC_010960.1	Sphoeroides pachygaster
NC_015341.1	Sphoeroides parvus
NC_015346.1	Sphoeroides testudineus
NC_022484.1	Sphyraena barracuda
NC_022489.1	Sphyraena japonica
NC_022679.1	Sphyrna lewini
NC_025778.1	Sphyrna zygaena
NC_009854.1	Spicara maena
NC_011582.1	Spinachia spinachia
NC_022149.1	Spinibarbus caldwelli
NC_021616.1	Spinibarbus denticulatus
NC_026129.1	Spinibarbus hollandi
NC_022465.1	Spinibarbus sinensis
NC_009588.1	Spratelloides delicatulus
NC_009589.1	Spratelloides gracilis
NC_016673.1	Sprattus antipodum
NC_016669.1	Sprattus muelleri
NC_009593.1	Sprattus sprattus
NC_023336.1	Squalidus argentatus
NC_024561.1	Squalidus gracilis
NC_022190.1	Squalidus wolterstorffi
NC_019652.1	Squaliobarbus curriculus
NC_008223.1	Squalogadus modificatus
NC_002012.1	Squalus acanthias
NC_025328.1	Squatina formosa
NC_024276.1	Squatina japonica
NC_025578.1	Squatina nebulosa
NC_013628.2	Stemonidium hypomelas
NC_020761.1	Stenodus leucichthys
NC_003177.1	Stephanolepis cirrhifer
NC_018054.1	Stiphodon alcedo
NC_026998.1	Strongylura anastomella
NC_009948.1	Stylephorus chordatus
NC_004416.1	Sufflamen fraenatum
NC_006919.1	Sundasalanx mekongensis
NC_016725.1	Sundasalanx praecox
NC_016663.1	Sundasalanx sp.
NC_027656.1	Symphurus orientalis
NC_023445.1	Symphurus plagiusa
NC_026689.1	Symphysodon discus
NC_026989.1	Synanceia verrucosa
NC_005805.1	Synaphobranchus kaupii
NC_024195.1	Synchiropus splendidus
NC_020767.1	Synechogobius ommaturus
NC_024196.1	Syngnathus schlegeli
NC_015808.1	Synodontis schoutedeni
NC_007228.1	Synodus variegatus
NC_026210.1	Taeniura lymma
NC_019641.1	Taeniura meyeni
NC_011633.1	Takifugu chinensis
NC_011624.1	Takifugu chrysops
NC_011622.1	Takifugu exascurus
NC_013087.1	Takifugu fasciatus
NC_024199.1	Takifugu flavidus
NC_011625.1	Takifugu niphobles
NC_011634.1	Takifugu oblongus
NC_011626.1	Takifugu obscurus
NC_011635.1	Takifugu ocellatus
NC_011627.1	Takifugu pardalis
NC_011621.1	Takifugu poecilonotus
NC_011628.1	Takifugu porphyreus
NC_004299.1	Takifugu rubripes
NC_011630.1	Takifugu snyderi
NC_011629.1	Takifugu stictonotus
NC_011631.1	Takifugu vermicularis
NC_011632.1	Takifugu xanthopterus
NC_013562.1	Talismania bifurcata
NC_027084.1	Tanakia himantegus
NC_024566.1	Tanakia lanceolata
NC_025515.1	Tanakia limbata
NC_027665.1	Tanakia tanago
NC_015539.1	Tanichthys albonubes
NC_022486.1	Taractes asper
NC_027189.1	Tarimichthys bombifrons
NC_016682.1	Tenualosa ilisha
NC_016719.1	Tenualosa thibaudeaui
NC_016700.1	Tenualosa toli
NC_027281.1	Terapon jarbua
NC_013879.1	Tetrabrachium ocellatum
NC_015347.1	Tetractenos glaber
NC_022500.1	Tetragonurus atlanticus
NC_022499.1	Tetragonurus cuvieri
NC_015743.1	Tetranematichthys quadrifilis
NC_015358.1	Tetraodon biocellatus
NC_015363.1	Tetraodon mbu
NC_015361.1	Tetraodon miurus
NC_007176.1	Tetraodon nigroviridis
NC_015355.1	Tetraodon palembangensis
NC_012679.1	Tetrapturus angustirostris
NC_012678.1	Kajikia audax
NC_013618.1	Thalassenchelys sp.
NC_027070.1	Thamnaconus hypargyreus
NC_011327.1	Thamnaconus modestus
NC_023804.1	Thamnaconus tessellatus
NC_013875.1	Thaumatichthys pagidostomus
NC_014264.1	Thryssa baelama
NC_005317.1	Thunnus alalunga
NC_014061.1	Thunnus albacares
NC_025519.1	Thunnus atlanticus
NC_014101.1	Thunnus maccoyii
NC_014059.1	Thunnus obesus
NC_008455.1	Thunnus orientalis
NC_014052.1	Thunnus thynnus
NC_004901.2	Thunnus thynnus thynnus
NC_020673.1	Thunnus tonggol
NC_012929.1	Thymallus arcticus
NC_027412.1	Thymallus brevirostris
NC_027411.1	Thymallus burejensis
NC_022925.1	Thymallus grubii
NC_027408.1	Thymallus pallasii
NC_012928.1	Thymallus thymallus
NC_027409.1	Thymallus tugarinae
NC_027410.1	Thymallus yaluensis
NC_022952.1	Thynnichthys polylepis
NC_022492.1	Thyrsitoides marleyi
NC_024853.1	Tilodon sexfasciatum
NC_008648.1	Tinca tinca
NC_027617.1	Tor khudree
NC_021755.1	Tor putitora
NC_022702.1	Tor sinensis
NC_023243.1	Tor tambroides
NC_027498.1	Tor tor
NC_011636.1	Torquigener brevipinnis
NC_015332.1	Torquigener hypselogeneion
NC_015367.1	Torquigener pleurogramma
NC_013151.1	Toxotes chatareus
NC_018770.1	Trachidermus fasciatus
NC_017900.1	Trachinops taeniatus
NC_024026.1	Trachinotus blochii
NC_024184.1	Trachinotus carolinus
NC_022707.1	Trachinotus ovatus
NC_003166.1	Trachipterus trachypterus
NC_002813.1	Trachurus japonicus
NC_006818.1	Trachurus trachurus
NC_008224.1	Trachyrincus murrayi
NC_018555.1	Trematocranus placodon
NC_009861.1	Triacanthodes anomalus
NC_009863.1	Triacanthus biaculeatus
NC_026287.1	Triaenodon obesus
NC_018819.1	Tribolodon brandtii
NC_018820.1	Tribolodon hakonensis
NC_008651.1	Tribolodon nakamurai
NC_018821.1	Tribolodon sachalinensis
NC_011719.1	Trichiurus japonicus
NC_018791.1	Trichiurus lepturus nanhaiensis
NC_026725.1	Trichogaster leerii
NC_027238.1	Trichogaster microlepis
NC_027687.1	Trichopodus leerii
NC_026580.1	Trichogaster trichopterus
NC_018823.1	Tridentiger barbatus
NC_015992.1	Tridentiger bifasciatus
NC_015535.1	Trigonostigma espei
NC_023769.1	Trinectes maculatus
NC_009859.1	Triodon macropterus
NC_024597.1	Triplophysa anterodorsalis
NC_018774.1	Triplophysa bleekeri
NC_025632.1	Triplophysa robusta
NC_019587.1	Triplophysa rosa
NC_024611.1	Triplophysa siluroides
NC_017890.1	Triplophysa stoliczkai
NC_026714.1	Triplophysa strauchii
NC_027517.1	Triplophysa yarkandensis
NC_022140.1	Triso dermopterus
NC_009862.1	Trixiphichthys weberi
NC_009063.1	Tropheus duboisi
NC_018815.1	Tropheus moorii
NC_016693.1	Trypauchen vagina
NC_015356.1	Tylerius spinosissimus
NC_011171.1	Tylochromis polylepis
NC_027600.1	Ulcina olrikii
NC_022456.1	Umbra pygmaea
NC_008680.1	Vaillantella maassi
NC_026213.1	Vanmanenia pingchowensis
NC_022139.1	Variola albimarginata
NC_022138.1	Variola louti
NC_008225.1	Ventrifossa garmani
NC_008461.1	Verasper moseri
NC_007939.1	Verasper variegatus
NC_011945.1	Xanthichthys auromarginatus
NC_011321.1	Xenobalistes tumidipectoris
NC_008682.1	Xenocypris argentea
NC_013072.1	Xenocypris davidi
NC_012715.1	Xenomystus nigri
NC_024574.1	Xenophysogobio boulengeri
NC_025300.1	Xenophysogobio nudicorpa
NC_011172.1	Oryzias sarasinorum
NC_011381.1	Xenotoca eiseni
NC_012677.1	Xiphias gladius
NC_013089.1	Xiphophorus hellerii
NC_011379.1	Xiphophorus maculatus
NC_010234.1	Xyrauchen texanus
NC_015540.1	Yaoshanicus arcus
NC_023105.1	Zacco platypus
NC_008653.1	Nipponocypris sieboldii
NC_009852.1	Zanclus cornutus
NC_024937.1	Zapteryx exasperata
NC_023944.1	Zearaja chilensis
NC_009874.1	Zebrasoma flavescens
NC_023225.1	Zebrias quagga
NC_021377.1	Zebrias zebra
NC_025199.1	Zebrias zebrinus
NC_004397.1	Zenion japonicum
NC_003173.1	Zenopsis nebulosus
NC_003190.1	Zeus faber
NC_003167.1	Zu cristatus
